# Supplementary material
Source: publisher figshare collection journal article supplement (https://karger.figshare.com/ndownloader/files/26879993)
Supplement: Supplementary file 1 [file 26879993]

**Supplementary Materials**

**Table 1. Primers for qPCR and *GPR101* sanger sequencing.**

| Number | Gene/Exon | Forward Primer | Reverse Primer | Products’ Length (base pair) |
| --- | --- | --- | --- | --- |
| 1 | ALB | TGAAACATACGTTCCCAAAGAGTTT | CTCTCCTTCTCAGAAAGTGTGCATAT | 81 |
| 2 | GPR101 | CCATTGTCGTGGTGTCAGTG | AGGTGCCATAGAGGAGCAGG | 105 |
| 3 | CD40LG | GCTCCATTTATAGCCAGCCTC | GTTTGGCGGAACTGTGGGT | 91 |
| 4 | GPR101-A | GTGTTTCTTTTGTCACCAGCATAG | GGGTCATCTTGGACGGGTA | 544 |
| 5 | GPR101-B | TTAGCCTCACCCACCTGTTC | GCCCCTGGCCTCTACACTAC | 584 |
| 6 | GPR101-C | AGGTGAGGTCAAGGCCAAG | AATGGTCTTGTGCATGTAGCC | 583 |
| 7 | GPR101-D | CAAAGCTGCTAAAGTGATCTTCAT | TTAATGAATTGTGGGTCCATTG | 427 |

Primers 1~3 were used for qPCR of *GPR101* and *CD40LG* gene, and *ALB* was the reference gene. Primers 4~7, which were *GPR101* A to D, were referred from the literature for sanger sequencing (Eur. J. Endocrinol., 174(4), 523-30. doi:10.1530/EJE-15-1044).
